# Supplementary material for: Transcriptome analysis in calorie-restricted rats implicates epigenetic and post-translational mechanisms in neuroprotection and aging
Source: PubMed Central journal article supplement (PMC4699360; doi:10.1186/s13059-015-0847-2), 2015-12-22

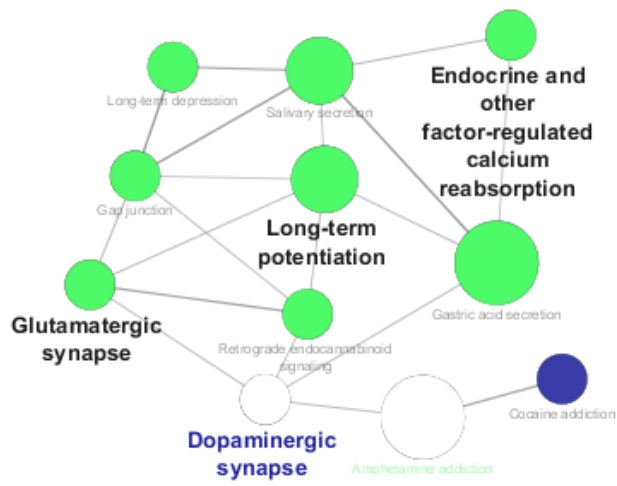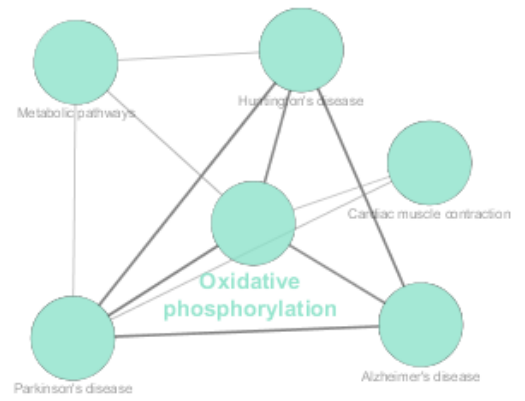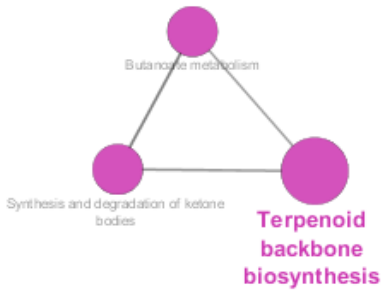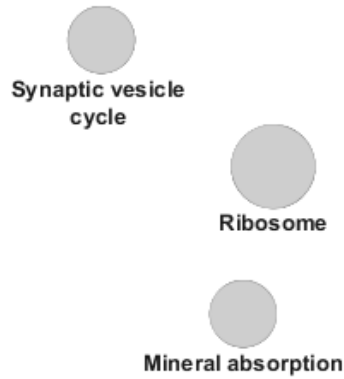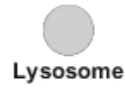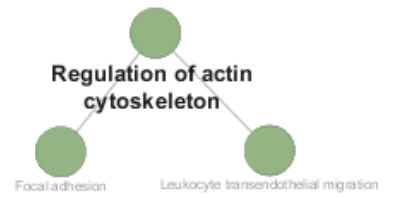

Supplement: 13059_2015_847_MOESM3_ESM.pdf [file 13059_2015_847_MOESM3_ESM.pdf]
